# Supplementary material for: Curious creatures: a multi-taxa investigation of responses to novelty in a zoo environment
Source: PeerJ. 2018 Mar 8;6:e4454. doi: 10.7717/peerj.4454 (PMC5845565; doi:10.7717/peerj.4454)
Supplement: Supplemental Information 1 [file peerj-06-4454-s001.xlsx]

## Sheet: Novel object test data
Species	Individual	Test.	Latency.to.contact	Frequency of interaction	Orientation.towardSobject.	Duration.of.interaction	Body lengths
Cockatoos	A	Mirror	900	0	900	0	4
Cockatoos	B	Mirror	900	0	461	0	4
Cockatoos	C	Mirror	900	0	900	0	4
Cockatoos	D	Mirror	900	0	900	0	4
Cockatoos	E	Mirror	900	0	900	0	4
Cockatoos	F	Mirror	900	0	900	0	4
Cockatoos	G	Mirror	900	0	900	0	4
Cockatoos	A	Moving	900	0	1	0	4
Cockatoos	B	Moving	900	0	55	0	4
Cockatoos	C	Moving	900	0	64	0	4
Cockatoos	D	Moving	900	0	1	0	2
Cockatoos	E	Moving	900	0	48	0	4
Cockatoos	F	Moving	900	0	1	0	4
Cockatoos	G	Moving	900	0	10	0	4
Cockatoos	A	S	900	0	900	0	4
Cockatoos	B	S	900	0	900	0	4
Cockatoos	C	S	900	0	900	0	4
Cockatoos	D	S	900	0	900	0	4
Cockatoos	E	S	900	0	900	0	4
Cockatoos	F	S	900	0	900	0	4
Cockatoos	G	S	900	0	900	0	4
Kangaroos	Blush.	Mirror	672	2	89	53	0
Kangaroos	Ruby	Mirror	700	10	108	149	0
Kangaroos	Ginger	Mirror	8	1	1	121	0
Kangaroos	Matilda	Mirror	900	0	95	0	4
Kangaroos	Ariel	Mirror	348	3	107	153	0
Kangaroos	Blush.	Moving	90	1	38	4	0
Kangaroos	Ruby	Moving	900	0	125	0	4
Kangaroos	Ginger	Moving	900	0	900	0	4
Kangaroos	Matilda	Moving	900	0	236	0	4
Kangaroos	Ariel	Moving	108	1	5	2	0
Kangaroos	Blush.	S	900	0	8	0	1
Kangaroos	Ruby	S	900	0	478	0	4
Kangaroos	Ginger	S	900	0	18	0	4
Kangaroos	Matilda	S	900	0	5	0	2
Kangaroos	Ariel	S	96	2	1	5	0
Lemurs	Andre.	Mirror	844	4	641	114	0
Lemurs	Solata.	Mirror	900	1	626	38	2
Lemurs	Bambo	Mirror	733	4	673	219	0
Lemurs	Makili	Mirror	900	7	680	100	1
Lemurs	Maki	Mirror	900	0	900	0	4
Lemurs	Julian.	Mirror	900	0	900	0	4
Lemurs	Casper	Mirror	900	0	900	0	4
Lemurs	Andriba	Mirror	900	0	900	0	4
Lemurs	Andre.	Moving	900	0	132	0	0.5
Lemurs	Solata.	Moving	900	0	2	0	0.5
Lemurs	Bambo	Moving	161	1	22	2	0
Lemurs	Makili	Moving	24	1	21	2	0
Lemurs	Maki	Moving	24	1	4	1	0
Lemurs	Julian.	Moving	198	1	7	1	0
Lemurs	Casper	Moving	900	0	853	0	4
Lemurs	Andriba	Moving	900	0	8	0	4
Lemurs	Andre.	S	124	2	105	900	0
Lemurs	Solata.	S	900	0	900	0	4
Lemurs	Bambo	S	1	2	1	12	0
Lemurs	Makili	S	214	2	209	9	0
Lemurs	Maki	S	1	2	1	10	0
Lemurs	Julian.	S	1	2	1	9	0
Lemurs	Casper	S	345	0	900	0	2
Lemurs	Andriba	S	900	0	900	0	4
Penguins	Blue.pink.	Mirror	1	12	1	353	0
Penguins	blue.green	Mirror	36	7	20	426	0
Penguins	Red	Mirror	36	12	29	318	0
Penguins	yellow	Mirror	43	10	29	356	0
Penguins	black.pink	Mirror	476	5	340	248	0
Penguins	vanilla	Mirror	37	6	35	291	0
Penguins	purple.blue	Mirror	175	3	93	52	0
Penguins	purple	Mirror	172	4	131	56	0
Penguins	white	Mirror	168	7	164	148	0
Penguins	squash..	Mirror	154	8	131	193	0
Penguins	Blue.pink.	Moving	380	1	379	1	0
Penguins	blue.green	Moving	900	0	900	0	NA
Penguins	Red	Moving	900	0	900	0	NA
Penguins	yellow	Moving	900	0	900	0	NA
Penguins	black.pink	Moving	900	0	900	0	NA
Penguins	vanilla	Moving	900	0	900	0	NA
Penguins	purple.blue	Moving	900	0	900	0	NA
Penguins	purple	Moving	900	0	900	0	NA
Penguins	white	Moving	900	0	900	0	NA
Penguins	squash..	Moving	900	0	900	0	NA
Penguins	Blue.pink.	S	900	0	79	0	1
Penguins	blue.green	S	900	0	54	0	0.5
Penguins	Red	S	900	0	900	0	4
Penguins	yellow	S	900	0	900	0	4
Penguins	black.pink	S	294	2	73	4	0
Penguins	vanilla	S	900	0	900	0	4
Penguins	purple.blue	S	900	0	900	0	4
Penguins	purple	S	900	0	900	0	4
Penguins	white	S	900	0	900	0	4
Penguins	squash..	S	90	3	86	7	0
Sheep.	GGL	Mirror	900	0	875	0	4
Sheep.	GGR	Mirror	900	0	900	0	4
Sheep.	PP	Mirror	900	0	900	0	4
Sheep.	YY	Mirror	900	0	892	0	4
Sheep.	YBD	Mirror	900	0	892	0	4
Sheep.	BB	Mirror	900	0	900	0	4
Sheep.	R	Mirror	900	0	900	0	4
Sheep.	O	Mirror	900	0	900	0	4
Sheep.	GR	Mirror	900	0	875	0	4
Sheep.	PI	Mirror	900	0	892	0	4
Sheep.	PU	Mirror	900	0	900	0	4
Sheep.	BO	Mirror	900	0	875	0	4
Sheep.	GGL	Moving	900	0	1	0	4
Sheep.	GGR	Moving	900	0	1	0	4
Sheep.	PP	Moving	900	0	1	0	4
Sheep.	YY	Moving	900	0	1	0	4
Sheep.	YBD	Moving	900	0	1	0	4
Sheep.	BB	Moving	900	0	1	0	4
Sheep.	R	Moving	900	0	1	0	4
Sheep.	O	Moving	900	0	1	0	4
Sheep.	GR	Moving	900	0	900	0	4
Sheep.	PI	Moving	900	0	1	0	4
Sheep.	PU	Moving	900	0	1	0	4
Sheep.	BO	Moving	900	0	1	0	4
Sheep.	GGL	S	900	0	900	0	4
Sheep.	GGR	S	900	0	900	0	4
Sheep.	PP	S	900	0	900	0	4
Sheep.	YY	S	900	0	900	0	4
Sheep.	YBD	S	900	0	900	0	4
Sheep.	BB	S	900	0	6	0	4
Sheep.	R	S	900	0	900	0	4
Sheep.	O	S	900	0	900	0	4
Sheep.	GR	S	900	0	900	0	4
Sheep.	PI	S	900	0	900	0	4
Sheep.	PU	S	900	0	900	0	4
Sheep.	BO	S	900	0	900	0	4
Tortoises	Red	Mirror	183	5	59	166	0
Tortoises	Green	Mirror	900	0	900	0	4
Tortoises	Blue	Mirror	514	4	1	154	0
Tortoises	Orange	Mirror	900	0	900	0	4
Tortoises	Purple	Mirror	660	1	648	105	0
Tortoises	Red	Moving	900	0	900	0	4
Tortoises	Green	Moving	900	0	403	0	0.5
Tortoises	Blue	Moving	900	0	66	0	1
Tortoises	Orange	Moving	900	0	790	0	4
Tortoises	Purple	Moving	900	0	158	0	4
Tortoises	Red	S	900	0	900	0	4
Tortoises	Green	S	900	0	619	0	2
Tortoises	Blue	S	900	0	900	0	4
Tortoises	Orange	S	900	0	260	0	4
Tortoises	Purple	S	900	0	14	0	4
